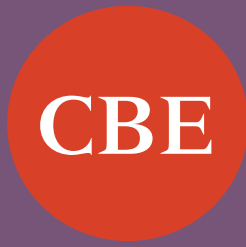

# Life Sciences Education

www.lifescied.org

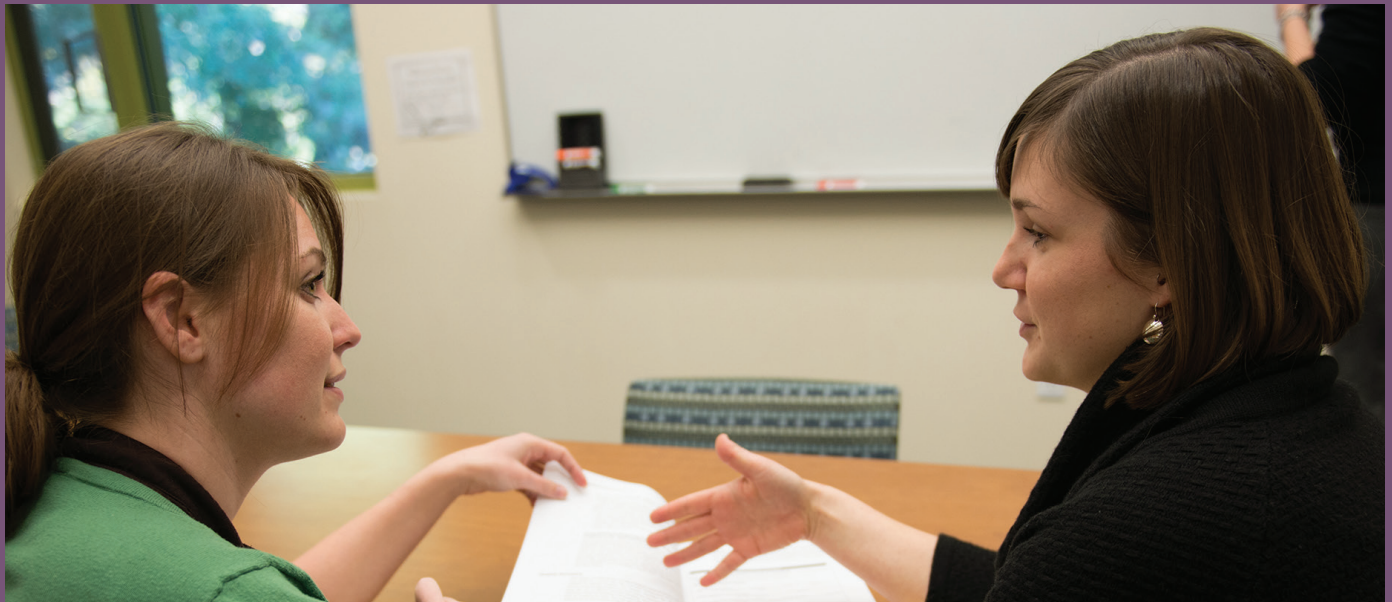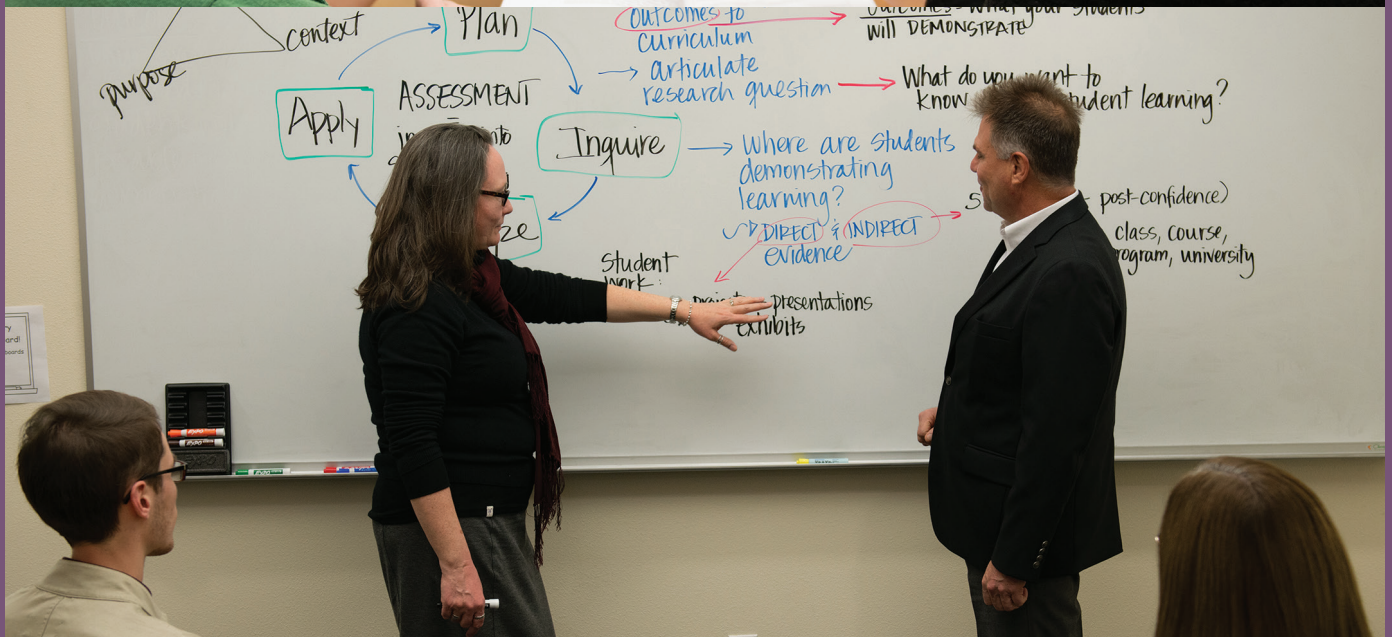

## Instructor Feedback
